# Supplementary material
Source: PubMed Central journal article supplement (PMC1948940)
Supplement: pnas_0702654104_2.pdf [file pnas_0702654104_2.pdf]

ITK\_Hs  
TEC\_Hs  
BMX\_Hs  
BTK\_Hs  
TXK\_Hs  
ABL\_Hs

TRLRYPVCFGRQKAPVTAGRLRYGKWIIPSELTFVVEIGSGQFGLVHLGYWLNK-DKVAI  
TRLRYPVSVKGNAPPTAGFVSYEKWEINPSELTFVRELGSGLFVVRLGKWRAG-YKVAI  
TRLRHPVSTKANKVPDSVSLGNGIWEIKREEITLLKELGSGQFGVVOLGKWKGO-YDVAI  
SRLLKYPVSOONKNAPSTAGLGYGSWEIDPKDLTFLKELGTGQFGVVKYGKWRGO-YDVAI  
TRLRYPVGLMGSCLPATAGFVSYEKWEIDPSELAFIKEIGSGQFGVVHLGEWRSH-IQVAI  
TTLHYPAKRNKPTVYGVSPNYDKWEMERTDITMKHKLGGQYGEVYEGVWKKYSILTVAI

: \* : : \* . . . . \* : . : : : : \* \* : \* \* \* \* \* \* \* \* \* \* \* \* \* \* \*  
gatekeeper

ITK\_Hs  
TEC\_Hs  
BMX\_Hs  
BTK\_Hs  
TXK\_Hs  
ABL\_Hs

KTIREGAMSEEDFIEEAQVMMKLSHPKLVQLYGVCLLEQAPICLVFEFMEHGCLSDYLRTO  
KAIREGAMCEEDFIEEAQVMMKLSHPKLVQLYGVCTOOKPIYIVTEFMERGCLLNFIQR  
KMIKEGSMSEDEFQEAOTMMKLSHPKLVKFGVCSKEYPIYIVTEYISNGCLLNYLRSH  
KMIKEGSMSEDEFIEEAQVMMNLSHEKLVQLYGVCTKORPIFIITEYMANGCLLNYLREM  
KAINEGSMSEEDFIEEAQVMMKLSHSHKLVQLYGVCIQRKPLYIVTEFMENGCLLNYLREN  
KTLKEDTMEVEEFLKEAAVMKEIKHPNLVOLLGVCTREPPFYIITEFTMYGNLLDYLRER

\* : . \* . : \* : : : : \* \* \* : : \* : : \* : : \* : : \* : : \* \* \* \* \* \* : : \* \* : : \* \* \* \* \* \*

ITK\_Hs  
TEC\_Hs  
BMX\_Hs  
BTK\_Hs  
TXK\_Hs  
ABL\_Hs

-RGLFAAETLLGMCLDVCEGMAYLEEACVHRDLAARNCLVGENOVIVKVSDFGMTRFVLD  
-OGHFHRDVLLSMCODVCEGMEYLERNSFIHRDLAARNCLVSEAGVVKVSDFGMARVFLD  
-GKGLLEPSOLLEMCYDVCEGMAFLESQHFHRDLAARNCLVDRDLQVVKVSDFGMTRYVLD  
-RHRFOTOOLLEMCQDVCEAMEYLESQFLHRDLAARNCLVNDQGVVKVSDFGLSRYVLD  
-KGLLRKEMLLSVCODICEGMEYLERNGVIHRDLAARNCLVSSSTCIVKISDFGMTRYVLD  
NROEVNAVVLVLYMATOISSAMEYLEKKNFIHRDLAARNCLVGENHLLVKVADFGLSRLMTG

. \* \* : . : : . . . \* : \* \* : \* : \* : \* \* \* \* \* \* \* \* \* \* \* \* \* \* \* \* \* \* \* \* \*

ITK\_Hs  
TEC\_Hs  
BMX\_Hs  
BTK\_Hs  
TXK\_Hs  
ABL\_Hs

DOYTSSTGTFKFPVKWASPEVFSFVSRYSSKSDVWSFGVLMWEVVFSEGKIPYENRNSNSEVVE  
DOYTSSSGAKFPVKWCPPEVFNFYSRFSKSDVWSFGVLMWEVVFTEGRMPFEKYTNVEVVT  
DOYVSSVGTFKFPVKWASPEVVFHYFKYSSKSDVWAFGILMWEVFLGKQPVDLYDNQOVVL  
DEYTSSSVGSKFPVVRWSPPEVLMYSKFSKSDIWFAGVLMWEIYSLGKMPYERFTNSSETAE  
DEYVSSFGAKFPPIKWSPPPEVFLFNKYSSKSDVWSFGVLMWEVVFTEGKMPFENKSNLQVVE  
DTYTAHAGAKFPPIKWTAPESLAYNKFSIKSDVWAFGVLWEIATYGMSPYPGIDLQVYE

\* \* : . \* : \* \* : \* \* : : : \* \* \* \* \* \* \* \* \* \* \* \* \* \* \* \* \* \* \* \* \* \* \* \* \* \* \* \*
