# Supplementary material
Source: PubMed Central journal article supplement (PMC1948940)
Supplement: pnas_0702654104_4.pdf [file pnas_0702654104_4.pdf]

**Table 1: Protein groups identified by mass spectrometry in bands 1 to 4 from the gel shown in Fig. 1a**

| Gel band | Protein group | Accession No.                 | Name                                                                            | Species             | Molecular mass (kDa) | No. unique peptides |
|----------|---------------|-------------------------------|---------------------------------------------------------------------------------|---------------------|----------------------|---------------------|
| 1        | 1             | <a href="#">IPI00556631.1</a> | V-abl Abelson murine leukemia viral oncogene homolog 1                          | <i>Homo sapiens</i> | 125.0                | 34                  |
|          |               | IPI00221171.3                 | Splice Isoform IB of Proto-oncogene tyrosine-protein kinase ABL1                | <i>Homo sapiens</i> | 125.0                | 33                  |
|          |               | IPI00216969.2                 | Splice Isoform IA of Proto-oncogene tyrosine-protein kinase ABL1                | <i>Homo sapiens</i> | 122.9                | 33                  |
|          |               | IPI00329488.4                 | Isoform IB of Tyrosine-protein kinase ABL2                                      | <i>Homo sapiens</i> | 128.3                | 5                   |
|          |               | IPI00383728.1                 | Isoform IA of Tyrosine-protein kinase ABL2                                      | <i>Homo sapiens</i> | 124.6                | 5                   |
|          |               | <a href="#">IPI00654653.1</a> | Bcr/c-abl oncogene protein                                                      | <i>Homo sapiens</i> | 17.1                 | 3                   |
|          |               | IPI00642809.1                 | Similar to Tyrosine-protein kinase transforming protein ABL                     | <i>Homo sapiens</i> | 13.6                 | 2                   |
|          |               |                               |                                                                                 |                     |                      |                     |
|          | 2             | IPI00472302.1                 | breakpoint cluster region isoform 2                                             | <i>Homo sapiens</i> | 137.7                | 30                  |
|          |               | IPI00004497.1                 | Breakpoint cluster region protein                                               | <i>Homo sapiens</i> | 142.8                | 30                  |
|          |               | IPI00375394.1                 | Breakpoint cluster region isoform 2                                             | <i>Homo sapiens</i> | 137.7                | 27                  |
|          |               | IPI00332355.1                 | Breakpoint cluster region protein (Fragment)                                    | <i>Homo sapiens</i> | 105.6                | 14                  |
|          |               | IPI00426447.1                 | BCR (Fragment)                                                                  | <i>Homo sapiens</i> | 29.6                 | 10                  |
|          |               | IPI00425740.1                 | Breakpoint cluster region protein (Fragment)                                    | <i>Homo sapiens</i> | 16.6                 | 2                   |
|          |               | IPI00425737.1                 | Breakpoint cluster region protein (Fragment)                                    | <i>Homo sapiens</i> | 18.7                 | 2                   |
|          |               | IPI00425739.1                 | Breakpoint cluster region protein (Fragment)                                    | <i>Homo sapiens</i> | 15.7                 | 2                   |
|          |               |                               |                                                                                 |                     |                      |                     |
| 2        | 1             | IPI00556631.1                 | V-abl Abelson murine leukemia viral oncogene homolog 1                          | <i>Homo sapiens</i> | 125.0                | 26                  |
|          |               | IPI00221171.3                 | Splice Isoform IB of Proto-oncogene tyrosine-protein kinase ABL1                | <i>Homo sapiens</i> | 125.0                | 26                  |
|          |               | IPI00216969.2                 | Splice Isoform IA of Proto-oncogene tyrosine-protein kinase ABL1                | <i>Homo sapiens</i> | 122.9                | 25                  |
|          |               | <a href="#">IPI00329488.4</a> | Isoform IB of Tyrosine-protein kinase ABL2                                      | <i>Homo sapiens</i> | 128.3                | 23                  |
|          |               | IPI00383728.1                 | Isoform IA of Tyrosine-protein kinase ABL2                                      | <i>Homo sapiens</i> | 124.6                | 22                  |
|          |               | <a href="#">IPI00654653.1</a> | Bcr/c-abl oncogene protein                                                      | <i>Homo sapiens</i> | 17.1                 | 3                   |
|          |               | IPI00642809.1                 | Similar to Tyrosine-protein kinase transforming protein ABL                     | <i>Homo sapiens</i> | 13.6                 | 2                   |
|          |               |                               |                                                                                 |                     |                      |                     |
| 3        | 1             | IPI00029132.1                 | Tyrosine-protein kinase BTK                                                     | <i>Homo sapiens</i> | 76.3                 | 28                  |
|          |               | IPI00646149.1                 | Bruton agammaglobulinemia tyrosine kinase                                       | <i>Homo sapiens</i> | 55.9                 | 18                  |
|          |               | IPI00654700.1                 | Tyrosine-protein kinase BTK isoform 65 (Fragment)                               | <i>Homo sapiens</i> | 27.0                 | 11                  |
|          |               | IPI00654580.1                 | Dominant-negative kinase-deficient Brutons tyrosine kinase isoform 3            | <i>Homo sapiens</i> | 19.5                 | 10                  |
|          |               | IPI00654849.1                 | Dominant-negative kinase-deficient Brutons tyrosine kinase isoform 6 (Fragment) | <i>Homo sapiens</i> | 24.2                 | 7                   |
|          |               | IPI00654751.1                 | Dominant-negative kinase-deficient Brutons tyrosine kinase isoform 10           | <i>Homo sapiens</i> | 16.1                 | 6                   |
|          |               |                               |                                                                                 |                     |                      |                     |
|          | 2             | <a href="#">IPI00000878.3</a> | Tyrosine-protein kinase Tec                                                     | <i>Homo sapiens</i> | 73.6                 | 19                  |

|   |   |                      |                                                                                                                    |                     |       |    |
|---|---|----------------------|--------------------------------------------------------------------------------------------------------------------|---------------------|-------|----|
| 4 | 1 | <b>IPI00013212.1</b> | Tyrosine-protein kinase CSK                                                                                        | <i>Homo sapiens</i> | 50.7  | 23 |
|   | 2 | IPI00298625.1        | v-yes-1 Yamaguchi sarcoma viral related oncogene homolog                                                           | <i>Homo sapiens</i> | 58.6  | 6  |
|   |   | IPI00432416.2        | Similar to Tyrosine-protein kinase LYN                                                                             | <i>Homo sapiens</i> | 56.1  | 6  |
|   | 3 | IPI00640091.1        | protein-tyrosine kinase fyn isoform b                                                                              | <i>Homo sapiens</i> | 60.1  | 3  |
|   |   | IPI00166845.1        | protein-tyrosine kinase fyn isoform c                                                                              | <i>Homo sapiens</i> | 54.5  | 3  |
|   |   | IPI00219012.2        | Proto-oncogene tyrosine-protein kinase Fyn                                                                         | <i>Homo sapiens</i> | 60.6  | 3  |
|   |   | IPI00328867.4        | Splice Isoform 2 of Proto-oncogene tyrosine-protein kinase Src                                                     | <i>Homo sapiens</i> | 60.6  | 2  |
|   |   | IPI00646197.1        | CDNA FLJ14219 fis, clone NT2RP3003800, highly similar to Rattus norvegicus tyrosine protein kinase pp60-c-src mRNA | <i>Homo sapiens</i> | 28.7  | 2  |
|   |   | IPI00641230.1        | proto-oncogene tyrosine-protein kinase SRC                                                                         | <i>Homo sapiens</i> | 59.8  | 2  |
|   |   | IPI00013981.2        | Proto-oncogene tyrosine-protein kinase YES                                                                         | <i>Homo sapiens</i> | 62.1  | 2  |
|   |   | IPI00477734.1        | 61 kDa protein                                                                                                     | <i>Homo sapiens</i> | 60.8  | 2  |
|   |   | IPI00639876.2        | FYN oncogene related to SRC, FGR, YES                                                                              | <i>Homo sapiens</i> | 54.7  | 2  |
|   | 4 | IPI00377017.3        | protein kinase Myt1 isoform 2                                                                                      | <i>Homo sapiens</i> | 52.1  | 2  |
|   |   | IPI00384765.2        | Membrane-associated tyrosine- and threonine-specific cdc2-inhibitory kinase                                        | <i>Homo sapiens</i> | 54.5  | 2  |
|   | 5 | <b>IPI00012318.2</b> | PREDICTED: mitogen-activated protein kinase kinase kinase 1                                                        | <i>Homo sapiens</i> | 179.3 | 2  |

Contains peptides identified by MSMS that are specific for the accession number.
