# Supplementary material
Source: PubMed Central journal article supplement (PMC1948940)
Supplement: pnas_0702654104_5.pdf [file pnas_0702654104_5.pdf]

**Table 2: Analysis of dasatinib targets based on the identity of its gatekeeper residue**

| <b>gatekeeper</b> | <b>No. of dasatinib targets</b> | <b>No. of kinases in kinome</b> |
|-------------------|---------------------------------|---------------------------------|
|                   |                                 |                                 |
| <b>Thr</b>        | 60                              | 94                              |
| <b>Met</b>        | 4                               | 183                             |
| <b>Val</b>        | 1                               | 15                              |
| <b>Ile</b>        |                                 | 10                              |
| <b>Asn</b>        |                                 | 2                               |
| <b>Ser</b>        |                                 | 5                               |
| <b>Leu</b>        |                                 | 79                              |
| <b>Phe</b>        |                                 | 67                              |
| <b>Gln</b>        |                                 | 8                               |
| <b>Glu</b>        |                                 | 6                               |
| <b>Arg</b>        |                                 | 4                               |
| <b>Tyr</b>        |                                 | 4                               |
| <b>Ala</b>        |                                 | 3                               |
| <b>Cys</b>        |                                 | 2                               |
| <b>Gly</b>        |                                 | 2                               |
| <b>Pro</b>        |                                 | 1                               |
| <b>Trp</b>        |                                 | 1                               |
|                   |                                 |                                 |
| <b>sum</b>        | 65                              | 486                             |

Kinases that are targeted by dasatinib identified by us (see Results and U. R., unpublished results), identified by Carter et al. (1) or the Invitrogen SelectScreen Panel ([http://www.invitrogen.com/downloads/SelectScreen\\_Data\\_193.pdf](http://www.invitrogen.com/downloads/SelectScreen_Data_193.pdf)) were sorted according to the identity of the gatekeeper residue. Among the 518 human kinases, the gatekeeper residue could unambiguously identified in 486 kinases.

1. Carter, T. A., Wodicka, L. M., Shah, N. P., Velasco, A. M., Fabian, M. A., Treiber, D. K., Milanov, Z. V., Atteridge, C. E., Biggs, W. H., 3rd, *et al.* (2005) *Proc Natl Acad Sci USA* 102, 11011-11016.
