# Supplementary material
Source: PubMed Central journal article supplement (PMC1948940)

A

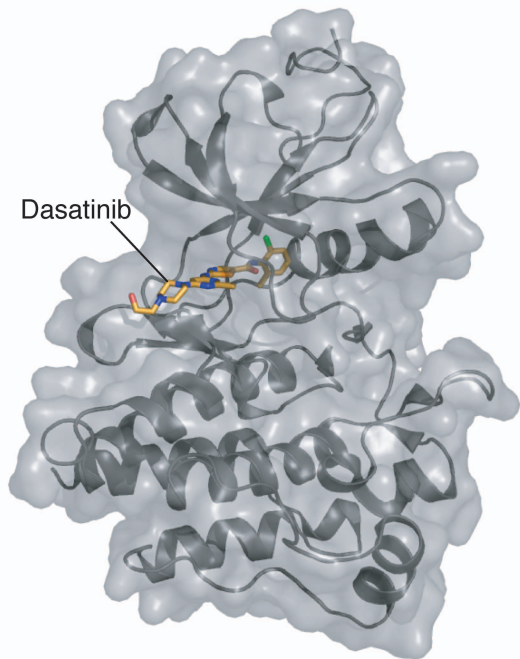

B

Dasatinib

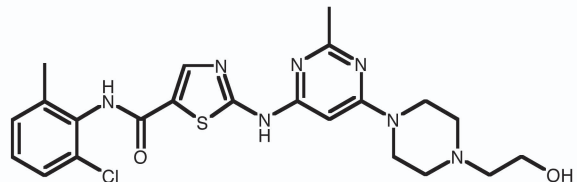

c-Dasatinib

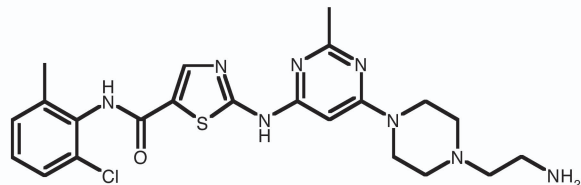

Supplement: pnas_0702654104_1.pdf [file pnas_0702654104_1.pdf]

**A**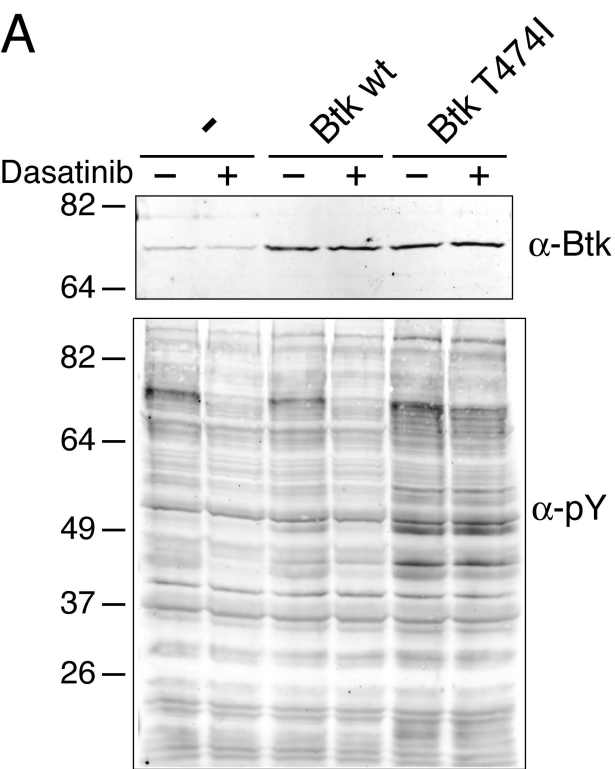**B**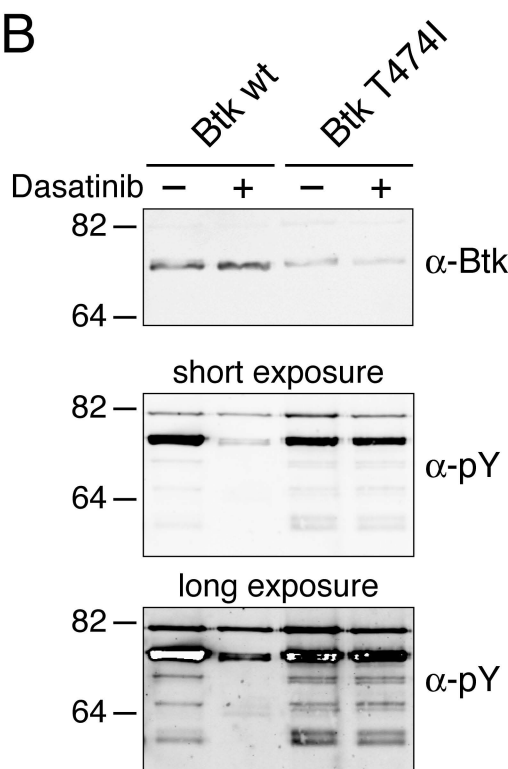

Supplement: pnas_0702654104_3.pdf [file pnas_0702654104_3.pdf]
